# Supplementary material
Source: PubMed Central journal article supplement (PMC4618302)
Supplement: NIHMS65576-supplement-1.pdf [file NIHMS65576-supplement-1.pdf]

## Contents

|                                               |       |
|-----------------------------------------------|-------|
| NfO-TEMPO-Me parameters.....                  | -s1-  |
| Atom numbering.....                           | -s1-  |
| Ground state GROMACS topology.....            | -s2-  |
| Excited state GROMACS topology.....           | -s8-  |
| Toluene parameters.....                       | -s15- |
| Velocity auto-correlation function (acf)..... | -s17- |
| Solvation shell radius.....                   | -s17- |
| References.....                               | -s18- |

### NfO-TEMPO-Me parameters

The complete sets of parameters for the NfO-TEMPO-Me (4-naphthoyloxy-1-methoxy-2,2,6,6-tetramethylpiperidine) ground and electronically excited state are reported.

The topologies are specified in the Gromacs 4.5.4 “.top” format<sup>1</sup> and they can be used directly for MD simulations in gas phase. The atomic charges were obtained through the CM5 procedure<sup>2</sup> from the equilibrium geometries, while the *sigma* and *epsilon* values are taken from similar atomtypes in the OPLS AA force field<sup>3,4</sup>.

All the parameters are obtained and written directly in the Gromacs format by the Joyce 2.0 package<sup>5,6</sup>.

### Atom numbering

See Fig. 1 for the atom numbers and the paper for the atomtype definitions.

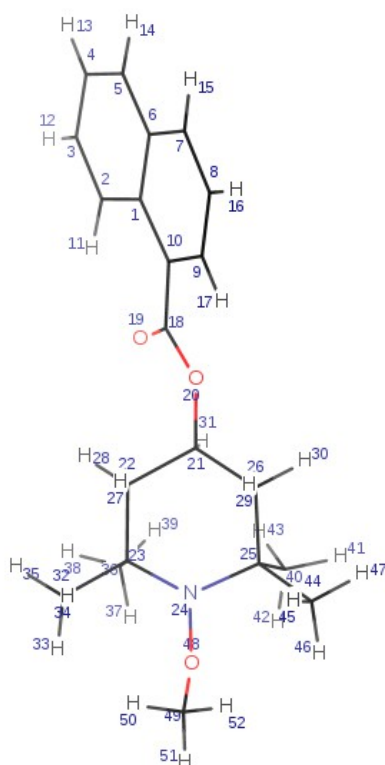

**Fig. 1:** The NfO-TEMPO-Me molecule and the atom numbers used in the topology files.

**Ground state GROMACS topology**

```
[ defaults ]
; nbfunc   comb-rule   gen-pairs   fudgeLJ   fudgeQQ
   1         3          no           1.0       1.0

[ atomtypes ]
; name      mass          charge ptype    sigma      epsilon
C1         12.0110         0.000  A       3.55000e-01  2.92880e-01
C2         12.0110         0.000  A       3.55000e-01  2.92880e-01
C3         12.0110         0.000  A       3.55000e-01  2.92880e-01
Cc         12.0110         0.000  A       3.55000e-01  3.17984e-01
Ct1        12.0110         0.000  A       3.50000e-01  2.76144e-01
Ct2        12.0110         0.000  A       3.50000e-01  2.76144e-01
Ctn        12.0110         0.000  A       3.50000e-01  2.76144e-01
Ct         12.0110         0.000  A       3.50000e-01  2.76144e-01
Co         12.0110         0.000  A       3.75000e-01  4.39320e-01
O          15.9994         0.000  A       2.90000e-01  5.85760e-01
Oc         15.9994         0.000  A       2.96000e-01  8.78640e-01
On         15.9994         0.000  A       2.96000e-01  8.78640e-01
Nt         14.0070         0.000  A       3.25000e-01  7.11280e-01
H2         1.0079          0.000  A       2.42000e-01  1.25520e-01
H3         1.0079          0.000  A       2.42000e-01  1.25520e-01
Ha         1.0079          0.000  A       2.42000e-01  1.25520e-01
Ht         1.0079          0.000  A       2.50000e-01  1.25520e-01
Ht1        1.0079          0.000  A       2.50000e-01  1.25520e-01
Ht2        1.0079          0.000  A       2.50000e-01  1.25520e-01

[ moleculetype ]
; Name      nrexcl
nft         3

[ atoms ]
; nr   type  resnr  res  atom  cgnr    charge    mass
  1   C1     1   nft  C1     1     0.000982  12.01100
  2   C2     1   nft  C2     2    -0.099993  12.01100
  3   C3     1   nft  C3     3    -0.101094  12.01100
  4   C3     1   nft  C3     4    -0.105663  12.01100
  5   C2     1   nft  C2     5    -0.101451  12.01100
  6   C1     1   nft  C1     6    -0.011475  12.01100
  7   C2     1   nft  C2     7    -0.086975  12.01100
  8   C3     1   nft  C3     8    -0.107463  12.01100
  9   C3     1   nft  C3     9    -0.088407  12.01100
 10  Cc     1   nft  Cc    10    -0.018322  12.01100
 11  H2     1   nft  H2    11     0.110523  1.00790
 12  Ha     1   nft  Ha    12     0.109367  1.00790
 13  Ha     1   nft  Ha    13     0.108965  1.00790
 14  Ha     1   nft  Ha    14     0.107837  1.00790
 15  Ha     1   nft  Ha    15     0.111799  1.00790
 16  Ha     1   nft  Ha    16     0.110430  1.00790
 17  H3     1   nft  H3    17     0.114614  1.00790
 18  Co     1   nft  Co    18     0.279924  12.01100
 19  O      1   nft  O     19    -0.320576  15.99940
 20  Oc     1   nft  Oc    20    -0.200854  15.99940
 21  Ct1    1   nft  Ct1   21     0.006497  12.01100
 22  Ct2    1   nft  Ct2   22    -0.166489  12.01100
 23  Ctn    1   nft  Ctn   23     0.080752  12.01100
```

|    |     |   |     |     |    |           |          |
|----|-----|---|-----|-----|----|-----------|----------|
| 24 | Nt  | 1 | nft | Nt  | 24 | -0.274850 | 14.00700 |
| 25 | Ctn | 1 | nft | Ctn | 25 | 0.080579  | 12.01100 |
| 26 | Ct2 | 1 | nft | Ct2 | 26 | -0.163912 | 12.01100 |
| 27 | Ht2 | 1 | nft | Ht2 | 27 | 0.101499  | 1.00790  |
| 28 | Ht2 | 1 | nft | Ht2 | 28 | 0.105740  | 1.00790  |
| 29 | Ht2 | 1 | nft | Ht2 | 29 | 0.102898  | 1.00790  |
| 30 | Ht2 | 1 | nft | Ht2 | 30 | 0.104054  | 1.00790  |
| 31 | Ht1 | 1 | nft | Ht1 | 31 | 0.113649  | 1.00790  |
| 32 | Ct  | 1 | nft | Ct  | 37 | -0.251421 | 12.01100 |
| 33 | Ht  | 1 | nft | Ht  | 38 | 0.095145  | 1.00790  |
| 34 | Ht  | 1 | nft | Ht  | 39 | 0.092548  | 1.00790  |
| 35 | Ht  | 1 | nft | Ht  | 40 | 0.092732  | 1.00790  |
| 36 | Ct  | 1 | nft | Ct  | 41 | -0.258818 | 12.01100 |
| 37 | Ht  | 1 | nft | Ht  | 42 | 0.096106  | 1.00790  |
| 38 | Ht  | 1 | nft | Ht  | 43 | 0.092560  | 1.00790  |
| 39 | Ht  | 1 | nft | Ht  | 44 | 0.090623  | 1.00790  |
| 40 | Ct  | 1 | nft | Ct  | 45 | -0.259616 | 12.01100 |
| 41 | Ht  | 1 | nft | Ht  | 46 | 0.090612  | 1.00790  |
| 42 | Ht  | 1 | nft | Ht  | 47 | 0.097137  | 1.00790  |
| 43 | Ht  | 1 | nft | Ht  | 48 | 0.089517  | 1.00790  |
| 44 | Ct  | 1 | nft | Ct  | 49 | -0.251666 | 12.01100 |
| 45 | Ht  | 1 | nft | Ht  | 50 | 0.092806  | 1.00790  |
| 46 | Ht  | 1 | nft | Ht  | 51 | 0.095466  | 1.00790  |
| 47 | Ht  | 1 | nft | Ht  | 52 | 0.091722  | 1.00790  |
| 48 | On  | 1 | nft | On  | 32 | -0.157050 | 15.99940 |
| 49 | Ct  | 1 | nft | Ct  | 33 | -0.145314 | 12.01100 |
| 50 | Ht  | 1 | nft | Ht  | 34 | 0.098255  | 1.00790  |
| 51 | Ht  | 1 | nft | Ht  | 35 | 0.108139  | 1.00790  |
| 52 | Ht  | 1 | nft | Ht  | 36 | 0.097932  | 1.00790  |

; Stretchings

[ bonds ]

|    |    |   |        |            |
|----|----|---|--------|------------|
| 1  | 2  | 1 | 0.1421 | 295428.277 |
| 2  | 3  | 1 | 0.1376 | 389704.417 |
| 3  | 4  | 1 | 0.1411 | 334055.220 |
| 4  | 5  | 1 | 0.1373 | 389704.417 |
| 1  | 6  | 1 | 0.1433 | 214674.769 |
| 5  | 6  | 1 | 0.1418 | 295428.277 |
| 6  | 7  | 1 | 0.1417 | 295428.277 |
| 7  | 8  | 1 | 0.1373 | 389704.417 |
| 8  | 9  | 1 | 0.1407 | 334055.220 |
| 1  | 10 | 1 | 0.1437 | 255388.900 |
| 9  | 10 | 1 | 0.1384 | 350687.318 |
| 2  | 11 | 1 | 0.1083 | 348251.793 |
| 3  | 12 | 1 | 0.1088 | 336716.460 |
| 4  | 13 | 1 | 0.1087 | 336716.460 |
| 5  | 14 | 1 | 0.1089 | 331717.248 |
| 7  | 15 | 1 | 0.1089 | 331717.248 |
| 8  | 16 | 1 | 0.1087 | 336716.460 |
| 9  | 17 | 1 | 0.1085 | 343833.699 |
| 10 | 18 | 1 | 0.1492 | 203433.885 |
| 18 | 19 | 1 | 0.1212 | 670324.835 |
| 18 | 20 | 1 | 0.1345 | 293586.495 |
| 20 | 21 | 1 | 0.1439 | 238984.170 |
| 21 | 22 | 1 | 0.1516 | 227593.665 |
| 22 | 23 | 1 | 0.1535 | 193608.595 |
| 23 | 24 | 1 | 0.1485 | 205311.077 |
| 24 | 25 | 1 | 0.1484 | 205311.077 |
| 21 | 26 | 1 | 0.1513 | 227593.665 |

|    |    |   |        |            |
|----|----|---|--------|------------|
| 25 | 26 | 1 | 0.1535 | 193608.595 |
| 22 | 27 | 1 | 0.1098 | 312688.400 |
| 22 | 28 | 1 | 0.1095 | 312688.400 |
| 26 | 29 | 1 | 0.1098 | 312688.400 |
| 26 | 30 | 1 | 0.1096 | 312688.400 |
| 21 | 31 | 1 | 0.1094 | 313756.075 |
| 23 | 32 | 1 | 0.1532 | 187859.978 |
| 32 | 33 | 1 | 0.1094 | 317872.889 |
| 32 | 34 | 1 | 0.1095 | 317872.889 |
| 32 | 35 | 1 | 0.1096 | 317872.889 |
| 23 | 36 | 1 | 0.1539 | 187859.978 |
| 36 | 37 | 1 | 0.1094 | 317872.889 |
| 36 | 38 | 1 | 0.1096 | 317872.889 |
| 36 | 39 | 1 | 0.1092 | 317872.889 |
| 25 | 40 | 1 | 0.1539 | 187859.978 |
| 40 | 41 | 1 | 0.1096 | 317872.889 |
| 40 | 42 | 1 | 0.1094 | 317872.889 |
| 40 | 43 | 1 | 0.1092 | 317872.889 |
| 25 | 44 | 1 | 0.1532 | 187859.978 |
| 44 | 45 | 1 | 0.1095 | 317872.889 |
| 44 | 46 | 1 | 0.1094 | 317872.889 |
| 44 | 47 | 1 | 0.1096 | 317872.889 |
| 24 | 48 | 1 | 0.1417 | 244404.989 |
| 48 | 49 | 1 | 0.1413 | 249065.487 |
| 49 | 50 | 1 | 0.1096 | 317872.889 |
| 49 | 51 | 1 | 0.1095 | 317872.889 |
| 49 | 52 | 1 | 0.1096 | 317872.889 |

; Bendings

[ angles ]

|    |    |    |   |        |          |
|----|----|----|---|--------|----------|
| 1  | 2  | 3  | 1 | 120.94 | 462.7985 |
| 2  | 1  | 6  | 1 | 117.73 | 580.7412 |
| 2  | 1  | 10 | 1 | 124.36 | 804.8759 |
| 1  | 2  | 11 | 1 | 118.76 | 276.2565 |
| 2  | 3  | 4  | 1 | 121.13 | 647.7019 |
| 3  | 2  | 11 | 1 | 120.30 | 340.6464 |
| 2  | 3  | 12 | 1 | 119.29 | 291.3257 |
| 3  | 4  | 5  | 1 | 119.51 | 647.7019 |
| 4  | 3  | 12 | 1 | 119.58 | 349.9091 |
| 3  | 4  | 13 | 1 | 120.10 | 349.9091 |
| 4  | 5  | 6  | 1 | 120.94 | 462.7985 |
| 5  | 4  | 13 | 1 | 120.40 | 291.3257 |
| 4  | 5  | 14 | 1 | 120.61 | 358.0181 |
| 1  | 6  | 5  | 1 | 119.75 | 580.7412 |
| 1  | 6  | 7  | 1 | 120.01 | 580.7412 |
| 6  | 1  | 10 | 1 | 117.90 | 408.1189 |
| 5  | 6  | 7  | 1 | 120.24 | 753.6716 |
| 6  | 5  | 14 | 1 | 118.45 | 282.6840 |
| 6  | 7  | 8  | 1 | 120.86 | 462.7985 |
| 6  | 7  | 15 | 1 | 118.60 | 282.6840 |
| 7  | 8  | 9  | 1 | 119.72 | 647.7019 |
| 8  | 7  | 15 | 1 | 120.54 | 358.0181 |
| 7  | 8  | 16 | 1 | 120.61 | 291.3257 |
| 8  | 9  | 10 | 1 | 121.69 | 613.2843 |
| 9  | 8  | 16 | 1 | 119.67 | 349.9091 |
| 8  | 9  | 17 | 1 | 119.51 | 386.8791 |
| 1  | 10 | 9  | 1 | 119.81 | 463.9117 |
| 1  | 10 | 18 | 1 | 121.88 | 419.8719 |
| 10 | 9  | 17 | 1 | 118.80 | 266.9345 |

|    |    |    |   |        |          |
|----|----|----|---|--------|----------|
| 9  | 10 | 18 | 1 | 118.30 | 575.1678 |
| 10 | 18 | 19 | 1 | 125.77 | 346.4522 |
| 10 | 18 | 20 | 1 | 111.84 | 194.3096 |
| 19 | 18 | 20 | 1 | 122.39 | 968.4915 |
| 18 | 20 | 21 | 1 | 117.04 | 726.7427 |
| 20 | 21 | 22 | 1 | 110.20 | 760.0122 |
| 20 | 21 | 26 | 1 | 106.82 | 760.0122 |
| 20 | 21 | 31 | 1 | 107.41 | 422.9746 |
| 21 | 22 | 23 | 1 | 112.58 | 594.8864 |
| 22 | 21 | 26 | 1 | 109.89 | 616.3931 |
| 21 | 22 | 27 | 1 | 108.08 | 404.5906 |
| 21 | 22 | 28 | 1 | 110.23 | 404.5906 |
| 22 | 21 | 31 | 1 | 110.70 | 352.3422 |
| 22 | 23 | 24 | 1 | 107.24 | 444.4157 |
| 23 | 22 | 27 | 1 | 109.03 | 378.2445 |
| 23 | 22 | 28 | 1 | 108.79 | 378.2445 |
| 22 | 23 | 32 | 1 | 107.79 | 543.0843 |
| 22 | 23 | 36 | 1 | 111.30 | 543.0843 |
| 23 | 24 | 25 | 1 | 118.91 | 626.2965 |
| 24 | 23 | 32 | 1 | 107.35 | 692.1551 |
| 24 | 23 | 36 | 1 | 115.20 | 692.1551 |
| 23 | 24 | 48 | 1 | 108.00 | 880.1386 |
| 24 | 25 | 26 | 1 | 107.23 | 444.4157 |
| 24 | 25 | 40 | 1 | 115.15 | 692.1551 |
| 24 | 25 | 44 | 1 | 107.40 | 692.1551 |
| 25 | 24 | 48 | 1 | 107.91 | 880.1386 |
| 21 | 26 | 25 | 1 | 112.53 | 594.8864 |
| 21 | 26 | 29 | 1 | 108.40 | 404.5906 |
| 21 | 26 | 30 | 1 | 110.38 | 404.5906 |
| 26 | 21 | 31 | 1 | 111.71 | 352.3422 |
| 25 | 26 | 29 | 1 | 108.97 | 378.2445 |
| 25 | 26 | 30 | 1 | 108.86 | 378.2445 |
| 26 | 25 | 40 | 1 | 111.37 | 543.0843 |
| 26 | 25 | 44 | 1 | 107.75 | 543.0843 |
| 27 | 22 | 28 | 1 | 108.03 | 332.6699 |
| 29 | 26 | 30 | 1 | 107.56 | 332.6699 |
| 23 | 32 | 33 | 1 | 111.02 | 364.1370 |
| 23 | 32 | 34 | 1 | 110.69 | 364.1370 |
| 23 | 32 | 35 | 1 | 109.71 | 364.1370 |
| 32 | 23 | 36 | 1 | 107.68 | 546.9719 |
| 33 | 32 | 34 | 1 | 109.05 | 311.1554 |
| 33 | 32 | 35 | 1 | 107.79 | 311.1554 |
| 34 | 32 | 35 | 1 | 108.50 | 311.1554 |
| 23 | 36 | 37 | 1 | 110.08 | 364.1370 |
| 23 | 36 | 38 | 1 | 109.30 | 364.1370 |
| 23 | 36 | 39 | 1 | 113.55 | 364.1370 |
| 37 | 36 | 38 | 1 | 108.10 | 311.1554 |
| 37 | 36 | 39 | 1 | 108.58 | 311.1554 |
| 38 | 36 | 39 | 1 | 107.06 | 311.1554 |
| 25 | 40 | 41 | 1 | 109.37 | 364.1370 |
| 25 | 40 | 42 | 1 | 110.03 | 364.1370 |
| 25 | 40 | 43 | 1 | 113.53 | 364.1370 |
| 40 | 25 | 44 | 1 | 107.64 | 546.9719 |
| 41 | 40 | 42 | 1 | 108.03 | 311.1554 |
| 41 | 40 | 43 | 1 | 107.32 | 311.1554 |
| 42 | 40 | 43 | 1 | 108.39 | 311.1554 |
| 25 | 44 | 45 | 1 | 110.67 | 364.1370 |
| 25 | 44 | 46 | 1 | 111.02 | 364.1370 |
| 25 | 44 | 47 | 1 | 109.75 | 364.1370 |

|    |    |    |   |        |          |
|----|----|----|---|--------|----------|
| 45 | 44 | 46 | 1 | 109.03 | 311.1554 |
| 45 | 44 | 47 | 1 | 108.50 | 311.1554 |
| 46 | 44 | 47 | 1 | 107.79 | 311.1554 |
| 24 | 48 | 49 | 1 | 111.10 | 714.1289 |
| 48 | 49 | 50 | 1 | 111.80 | 486.8403 |
| 48 | 49 | 51 | 1 | 105.45 | 486.8403 |
| 48 | 49 | 52 | 1 | 111.79 | 486.8403 |
| 50 | 49 | 51 | 1 | 109.41 | 311.1554 |
| 50 | 49 | 52 | 1 | 108.88 | 311.1554 |
| 51 | 49 | 52 | 1 | 109.42 | 311.1554 |

```

; Torsions
[ dihedrals ]
; naphthalene harmonic
  1  2  3  4  2    0.0    53.573
  2  3  4  5  2    0.0    53.573
  3  4  5  6  2    0.0    53.573
  4  5  6  1  2    0.0    53.573
  2  1  6  5  2    0.0    53.573
  6  1  2  3  2    0.0    53.573
  6  7  8  9  2    0.0    53.573
  7  8  9 10  2    0.0    53.573
  8  9 10  1  2    0.0    53.573
  6  1 10  9  2    0.0    53.573
  1  6  7  8  2    0.0    53.573
 10  1  6  7  2    0.0    53.573
 10  1  6  5  2   180.0    53.573
  2  1  6  7  2   180.0    53.573
; naphthalene harmonic o.o.p.
 12  2  4  3  2    0.0    554.247
 13  3  5  4  2    0.0    554.247
 14  4  6  5  2    0.0    554.247
 15  6  8  7  2    0.0    554.247
 16  7  9  8  2    0.0    554.247
 17  8 10  9  2    0.0    554.247
 11  1  3  2  2    0.0    554.247
 10  1  9 18  2    0.0    583.337
; d2 dihedral (harm)
 19 18 20 21  2    0.0    30.340
; o.o.p. COO-nfo
 10 19 20 18  2    0.0    928.593
; TEMPO ring
 20 21 22 23  1    0.00    8.953  3
 20 21 26 25  1    0.00    8.953  3
 26 21 22 23  1    0.00    0.980  3
 22 21 26 25  1    0.00    0.980  3
 22 23 24 25  1    0.00    0.980  3
 23 24 25 26  1    0.00    0.980  3
 21 22 23 24  1    0.00    0.980  3
 24 25 26 21  1    0.00    0.980  3
; OCH3@TEMPO
 32 23 24 48  1    0.00    5.611  3
 36 23 24 48  1    0.00    5.611  3
 22 23 24 48  1    0.00   20.229  3
 48 24 25 26  1    0.00   20.229  3
; CH3@TEMPO
 21 22 23 32  1    0.00    6.026  3
 32 23 24 25  1    0.00    0.980  3
 21 22 23 36  1    0.00    0.980  3

```

|               |    |    |    |   |      |        |   |
|---------------|----|----|----|---|------|--------|---|
| 36            | 23 | 24 | 25 | 1 | 0.00 | 0.980  | 3 |
| 40            | 25 | 26 | 21 | 1 | 0.00 | 0.980  | 3 |
| 23            | 24 | 25 | 40 | 1 | 0.00 | 0.980  | 3 |
| 44            | 25 | 26 | 21 | 1 | 0.00 | 0.980  | 3 |
| 23            | 24 | 25 | 44 | 1 | 0.00 | 0.980  | 3 |
| ; -CH3@C24    |    |    |    |   |      |        |   |
| 22            | 23 | 32 | 33 | 1 | 0.00 | 3.371  | 3 |
| 22            | 23 | 32 | 34 | 1 | 0.00 | 3.371  | 3 |
| 22            | 23 | 32 | 35 | 1 | 0.00 | 3.371  | 3 |
| 24            | 23 | 32 | 33 | 1 | 0.00 | 3.801  | 3 |
| 24            | 23 | 32 | 34 | 1 | 0.00 | 3.801  | 3 |
| 24            | 23 | 32 | 35 | 1 | 0.00 | 3.801  | 3 |
| 24            | 23 | 36 | 37 | 1 | 0.00 | 3.801  | 3 |
| 24            | 23 | 36 | 38 | 1 | 0.00 | 3.801  | 3 |
| 24            | 23 | 36 | 39 | 1 | 0.00 | 3.801  | 3 |
| 22            | 23 | 36 | 37 | 1 | 0.00 | 3.371  | 3 |
| 22            | 23 | 36 | 38 | 1 | 0.00 | 3.371  | 3 |
| 22            | 23 | 36 | 39 | 1 | 0.00 | 3.371  | 3 |
| ; -CH3@C26    |    |    |    |   |      |        |   |
| 24            | 25 | 40 | 41 | 1 | 0.00 | 3.801  | 3 |
| 24            | 25 | 40 | 42 | 1 | 0.00 | 3.801  | 3 |
| 24            | 25 | 40 | 43 | 1 | 0.00 | 3.801  | 3 |
| 26            | 25 | 40 | 41 | 1 | 0.00 | 3.371  | 3 |
| 26            | 25 | 40 | 42 | 1 | 0.00 | 3.371  | 3 |
| 26            | 25 | 40 | 43 | 1 | 0.00 | 3.371  | 3 |
| 24            | 25 | 44 | 45 | 1 | 0.00 | 3.801  | 3 |
| 24            | 25 | 44 | 46 | 1 | 0.00 | 3.801  | 3 |
| 24            | 25 | 44 | 47 | 1 | 0.00 | 3.801  | 3 |
| 26            | 25 | 44 | 45 | 1 | 0.00 | 3.371  | 3 |
| 26            | 25 | 44 | 46 | 1 | 0.00 | 3.371  | 3 |
| 26            | 25 | 44 | 47 | 1 | 0.00 | 3.371  | 3 |
| ; CH3@NO      |    |    |    |   |      |        |   |
| 24            | 48 | 49 | 50 | 1 | 0.00 | 4.391  | 3 |
| 24            | 48 | 49 | 51 | 1 | 0.00 | 4.391  | 3 |
| 24            | 48 | 49 | 52 | 1 | 0.00 | 4.391  | 3 |
| ; d1 dihedral |    |    |    |   |      |        |   |
| 1             | 10 | 18 | 19 | 1 | 0.00 | -1.374 | 1 |
| 1             | 10 | 18 | 19 | 1 | 0.00 | -3.513 | 2 |
| 1             | 10 | 18 | 19 | 1 | 0.00 | -0.136 | 3 |
| 1             | 10 | 18 | 19 | 1 | 0.00 | 1.021  | 4 |
| 9             | 10 | 18 | 20 | 1 | 0.00 | -1.374 | 1 |
| 9             | 10 | 18 | 20 | 1 | 0.00 | -3.513 | 2 |
| 9             | 10 | 18 | 20 | 1 | 0.00 | -0.136 | 3 |
| 9             | 10 | 18 | 20 | 1 | 0.00 | 1.021  | 4 |
| ; d3 dihedral |    |    |    |   |      |        |   |
| 18            | 20 | 21 | 22 | 1 | 0.00 | 16.795 | 1 |
| 18            | 20 | 21 | 22 | 1 | 0.00 | 7.218  | 2 |
| 18            | 20 | 21 | 22 | 1 | 0.00 | 3.362  | 3 |
| 18            | 20 | 21 | 22 | 1 | 0.00 | -0.184 | 4 |
| 18            | 20 | 21 | 26 | 1 | 0.00 | 16.795 | 1 |
| 18            | 20 | 21 | 26 | 1 | 0.00 | 7.218  | 2 |
| 18            | 20 | 21 | 26 | 1 | 0.00 | 3.362  | 3 |
| 18            | 20 | 21 | 26 | 1 | 0.00 | -0.184 | 4 |
| ; d4 dihedral |    |    |    |   |      |        |   |
| 23            | 24 | 48 | 49 | 1 | 0.00 | 23.126 | 1 |
| 23            | 24 | 48 | 49 | 1 | 0.00 | 22.487 | 2 |
| 23            | 24 | 48 | 49 | 1 | 0.00 | 4.000  | 3 |
| 23            | 24 | 48 | 49 | 1 | 0.00 | 13.548 | 4 |
| 25            | 24 | 48 | 49 | 1 | 0.00 | 23.126 | 1 |

|    |    |    |    |   |      |        |   |
|----|----|----|----|---|------|--------|---|
| 25 | 24 | 48 | 49 | 1 | 0.00 | 22.487 | 2 |
| 25 | 24 | 48 | 49 | 1 | 0.00 | 4.000  | 3 |
| 25 | 24 | 48 | 49 | 1 | 0.00 | 13.548 | 4 |

; Nonbonded terms

[ pairs ]

; other nb interactions

|    |    |   |       |        |        |        |           |
|----|----|---|-------|--------|--------|--------|-----------|
| 18 | 23 | 2 | 1.000 | 0.280  | 0.081  | 0.3625 | 0.3483000 |
| 18 | 24 | 2 | 1.000 | 0.280  | -0.275 | 0.3500 | 0.5590000 |
| 18 | 25 | 2 | 1.000 | 0.280  | 0.081  | 0.3625 | 0.3483000 |
| 18 | 32 | 2 | 1.000 | 0.280  | -0.251 | 0.3625 | 0.3483000 |
| 18 | 36 | 2 | 1.000 | 0.280  | -0.259 | 0.3625 | 0.3483000 |
| 18 | 40 | 2 | 1.000 | 0.280  | -0.260 | 0.3625 | 0.3483000 |
| 18 | 44 | 2 | 1.000 | 0.280  | -0.252 | 0.3625 | 0.3483000 |
| 20 | 24 | 2 | 1.000 | -0.201 | -0.275 | 0.3105 | 0.7905400 |
| 20 | 48 | 2 | 1.000 | -0.201 | -0.157 | 0.2960 | 0.8786400 |
| 20 | 32 | 2 | 1.000 | -0.201 | -0.251 | 0.3230 | 0.4925800 |
| 20 | 36 | 2 | 1.000 | -0.201 | -0.259 | 0.3230 | 0.4925800 |
| 20 | 40 | 2 | 1.000 | -0.201 | -0.260 | 0.3230 | 0.4925800 |
| 20 | 44 | 2 | 1.000 | -0.201 | -0.252 | 0.3230 | 0.4925800 |
| 21 | 48 | 2 | 1.000 | 0.006  | -0.157 | 0.3230 | 0.4925800 |
| 22 | 40 | 2 | 1.000 | -0.166 | -0.260 | 0.3500 | 0.2761400 |
| 22 | 44 | 2 | 1.000 | -0.166 | -0.252 | 0.3500 | 0.2761400 |
| 26 | 32 | 2 | 1.000 | -0.164 | -0.251 | 0.3500 | 0.2761400 |
| 26 | 36 | 2 | 1.000 | -0.164 | -0.259 | 0.3500 | 0.2761400 |
| 32 | 40 | 2 | 1.000 | -0.251 | -0.260 | 0.3500 | 0.2761400 |
| 32 | 44 | 2 | 1.000 | -0.251 | -0.252 | 0.3500 | 0.2761400 |
| 36 | 40 | 2 | 1.000 | -0.259 | -0.260 | 0.3500 | 0.2761400 |
| 36 | 44 | 2 | 1.000 | -0.259 | -0.252 | 0.3500 | 0.2761400 |

[ system ]

; Name

NfO-TEMPO-ME GS (nft) Joyce

[ molecules ]

; Compound #mols

nft 1

## Excited state GROMACS topology

[ defaults ]

|          |           |           |         |         |
|----------|-----------|-----------|---------|---------|
| ; nbfunc | comb-rule | gen-pairs | fudgeLJ | fudgeQQ |
| 1        | 3         | no        | 1.0     | 1.0     |

[ atomtypes ]

| ; name | mass    | charge | ptype | sigma       | epsilon     |
|--------|---------|--------|-------|-------------|-------------|
| C1     | 12.0110 | 0.000  | A     | 3.55000e-01 | 2.92880e-01 |
| C2     | 12.0110 | 0.000  | A     | 3.55000e-01 | 2.92880e-01 |
| C3     | 12.0110 | 0.000  | A     | 3.55000e-01 | 2.92880e-01 |
| Cc     | 12.0110 | 0.000  | A     | 3.55000e-01 | 3.17984e-01 |
| Ct1    | 12.0110 | 0.000  | A     | 3.50000e-01 | 2.76144e-01 |
| Ct2    | 12.0110 | 0.000  | A     | 3.50000e-01 | 2.76144e-01 |
| Ctn    | 12.0110 | 0.000  | A     | 3.50000e-01 | 2.76144e-01 |
| Ct     | 12.0110 | 0.000  | A     | 3.50000e-01 | 2.76144e-01 |
| Co     | 12.0110 | 0.000  | A     | 3.75000e-01 | 4.39320e-01 |
| O      | 15.9994 | 0.000  | A     | 2.90000e-01 | 5.85760e-01 |



|     |         |       |   |             |             |
|-----|---------|-------|---|-------------|-------------|
| Oc  | 15.9994 | 0.000 | A | 2.96000e-01 | 8.78640e-01 |
| On  | 15.9994 | 0.000 | A | 2.96000e-01 | 8.78640e-01 |
| Nt  | 14.0070 | 0.000 | A | 3.25000e-01 | 7.11280e-01 |
| H2  | 1.0079  | 0.000 | A | 2.42000e-01 | 1.25520e-01 |
| H3  | 1.0079  | 0.000 | A | 2.42000e-01 | 1.25520e-01 |
| Ha  | 1.0079  | 0.000 | A | 2.42000e-01 | 1.25520e-01 |
| Ht  | 1.0079  | 0.000 | A | 2.50000e-01 | 1.25520e-01 |
| Ht1 | 1.0079  | 0.000 | A | 2.50000e-01 | 1.25520e-01 |
| Ht2 | 1.0079  | 0.000 | A | 2.50000e-01 | 1.25520e-01 |

```
[ moleculetype ]
; Name          nrexcl
nft

[ atoms ]
; nr type  resnr residue  atom  cgnr  charge  mass
 1  C1      1     nft     C1     1    -0.003118 12.01100
 2  C2      1     nft     C2     2    -0.021678 12.01100
 3  C3      1     nft     C3     3    -0.085175 12.01100
 4  C3      1     nft     C3     4    -0.087572 12.01100
 5  C2      1     nft     C2     5    -0.032532 12.01100
 6  C1      1     nft     C1     6    -0.016571 12.01100
 7  C2      1     nft     C2     7    -0.129469 12.01100
 8  C3      1     nft     C3     8    -0.105161 12.01100
 9  C3      1     nft     C3     9    -0.108548 12.01100
10  Cc      1     nft     Cc    10    -0.030973 12.01100
11  H2      1     nft     H2    11     0.124927  1.00790
12  Ha      1     nft     Ha    12     0.119511  1.00790
13  Ha      1     nft     Ha    13     0.118770  1.00790
14  Ha      1     nft     Ha    14     0.121784  1.00790
15  Ha      1     nft     Ha    15     0.098526  1.00790
16  Ha      1     nft     Ha    16     0.108384  1.00790
17  H3      1     nft     H3    17     0.107775  1.00790
18  Co      1     nft     Co    18     0.228264 12.01100
19  O       1     nft     O     19    -0.359447 15.99940
20  Oc      1     nft     Oc    20    -0.208081 15.99940
21  Ct1     1     nft     Ct1   21     0.004542 12.01100
22  Ct2     1     nft     Ct2   22    -0.166937 12.01100
23  Ctn     1     nft     Ctn   23     0.080483 12.01100
24  Nt      1     nft     Nt    24    -0.274441 14.00700
25  Ctn     1     nft     Ctn   25     0.080431 12.01100
26  Ct2     1     nft     Ct2   26    -0.164583 12.01100
27  Ht2     1     nft     Ht2   27     0.100281  1.00790
28  Ht2     1     nft     Ht2   28     0.103949  1.00790
29  Ht2     1     nft     Ht2   29     0.101905  1.00790
30  Ht2     1     nft     Ht2   30     0.102543  1.00790
31  Ht1     1     nft     Ht1   31     0.111486  1.00790
32  Ct      1     nft     Ct    32    -0.252112 12.01100
33  Ht      1     nft     Ht    33     0.093826  1.00790
34  Ht      1     nft     Ht    34     0.092003  1.00790
35  Ht      1     nft     Ht    35     0.091648  1.00790
36  Ct      1     nft     Ct    36    -0.259341 12.01100
37  Ht      1     nft     Ht    37     0.094686  1.00790
38  Ht      1     nft     Ht    38     0.091241  1.00790
39  Ht      1     nft     Ht    39     0.090725  1.00790
40  Ct      1     nft     Ct    40    -0.260077 12.01100
41  Ht      1     nft     Ht    41     0.089620  1.00790
42  Ht      1     nft     Ht    42     0.095868  1.00790
43  Ht      1     nft     Ht    43     0.089519  1.00790
```

|    |    |   |     |    |    |           |          |
|----|----|---|-----|----|----|-----------|----------|
| 44 | Ct | 1 | nft | Ct | 44 | -0.252227 | 12.01100 |
| 45 | Ht | 1 | nft | Ht | 45 | 0.092305  | 1.00790  |
| 46 | Ht | 1 | nft | Ht | 46 | 0.094291  | 1.00790  |
| 47 | Ht | 1 | nft | Ht | 47 | 0.090923  | 1.00790  |
| 48 | On | 1 | nft | On | 48 | -0.157942 | 15.99940 |
| 49 | Ct | 1 | nft | Ct | 49 | -0.146219 | 12.01100 |
| 50 | Ht | 1 | nft | Ht | 50 | 0.097724  | 1.00790  |
| 51 | Ht | 1 | nft | Ht | 51 | 0.106936  | 1.00790  |
| 52 | Ht | 1 | nft | Ht | 52 | 0.097330  | 1.00790  |

; Stretchings

[ bonds ]

|    |    |   |        |            |
|----|----|---|--------|------------|
| 1  | 2  | 1 | 0.1420 | 277993.176 |
| 2  | 3  | 1 | 0.1419 | 303261.801 |
| 3  | 4  | 1 | 0.1377 | 380047.069 |
| 4  | 5  | 1 | 0.1413 | 303261.801 |
| 1  | 6  | 1 | 0.1427 | 232307.908 |
| 5  | 6  | 1 | 0.1416 | 277993.176 |
| 6  | 7  | 1 | 0.1417 | 277993.176 |
| 7  | 8  | 1 | 0.1408 | 303261.801 |
| 8  | 9  | 1 | 0.1379 | 380047.069 |
| 1  | 10 | 1 | 0.1437 | 249809.383 |
| 9  | 10 | 1 | 0.1438 | 276305.657 |
| 2  | 11 | 1 | 0.1086 | 340901.458 |
| 3  | 12 | 1 | 0.1086 | 337795.484 |
| 4  | 13 | 1 | 0.1087 | 337795.484 |
| 5  | 14 | 1 | 0.1089 | 335396.564 |
| 7  | 15 | 1 | 0.1087 | 335396.564 |
| 8  | 16 | 1 | 0.1088 | 337795.484 |
| 9  | 17 | 1 | 0.1084 | 345920.857 |
| 10 | 18 | 1 | 0.1452 | 248953.714 |
| 18 | 19 | 1 | 0.1231 | 568205.204 |
| 18 | 20 | 1 | 0.1362 | 284823.316 |
| 20 | 21 | 1 | 0.1430 | 244126.533 |
| 21 | 22 | 1 | 0.1518 | 222567.704 |
| 22 | 23 | 1 | 0.1535 | 192388.537 |
| 23 | 24 | 1 | 0.1485 | 203601.308 |
| 24 | 25 | 1 | 0.1484 | 203601.308 |
| 21 | 26 | 1 | 0.1514 | 222567.704 |
| 25 | 26 | 1 | 0.1535 | 192388.537 |
| 22 | 27 | 1 | 0.1098 | 312497.237 |
| 22 | 28 | 1 | 0.1095 | 312497.237 |
| 26 | 29 | 1 | 0.1098 | 312497.237 |
| 26 | 30 | 1 | 0.1097 | 312497.237 |
| 21 | 31 | 1 | 0.1095 | 311819.293 |
| 23 | 32 | 1 | 0.1532 | 188081.888 |
| 32 | 33 | 1 | 0.1094 | 317613.282 |
| 32 | 34 | 1 | 0.1095 | 317613.282 |
| 32 | 35 | 1 | 0.1096 | 317613.282 |
| 23 | 36 | 1 | 0.1539 | 188081.888 |
| 36 | 37 | 1 | 0.1094 | 317613.282 |
| 36 | 38 | 1 | 0.1096 | 317613.282 |
| 36 | 39 | 1 | 0.1092 | 317613.282 |
| 25 | 40 | 1 | 0.1539 | 188081.888 |
| 40 | 41 | 1 | 0.1096 | 317613.282 |
| 40 | 42 | 1 | 0.1094 | 317613.282 |
| 40 | 43 | 1 | 0.1092 | 317613.282 |
| 25 | 44 | 1 | 0.1532 | 188081.888 |
| 44 | 45 | 1 | 0.1095 | 317613.282 |

|    |    |   |        |            |
|----|----|---|--------|------------|
| 44 | 46 | 1 | 0.1094 | 317613.282 |
| 44 | 47 | 1 | 0.1096 | 317613.282 |
| 24 | 48 | 1 | 0.1418 | 241617.085 |
| 48 | 49 | 1 | 0.1413 | 250283.138 |
| 49 | 50 | 1 | 0.1096 | 317613.282 |
| 49 | 51 | 1 | 0.1095 | 317613.282 |
| 49 | 52 | 1 | 0.1096 | 317613.282 |

; Bendings

[ angles ]

|    |    |    |   |        |           |
|----|----|----|---|--------|-----------|
| 1  | 2  | 3  | 1 | 122.70 | 591.6013  |
| 2  | 1  | 6  | 1 | 117.56 | 383.0370  |
| 2  | 1  | 10 | 1 | 123.03 | 709.0996  |
| 1  | 2  | 11 | 1 | 117.22 | 293.1945  |
| 2  | 3  | 4  | 1 | 119.48 | 581.3579  |
| 3  | 2  | 11 | 1 | 120.07 | 323.9958  |
| 2  | 3  | 12 | 1 | 119.26 | 327.5501  |
| 3  | 4  | 5  | 1 | 118.79 | 581.3579  |
| 4  | 3  | 12 | 1 | 121.25 | 292.5916  |
| 3  | 4  | 13 | 1 | 121.41 | 292.5916  |
| 4  | 5  | 6  | 1 | 123.04 | 591.6013  |
| 5  | 4  | 13 | 1 | 119.80 | 327.5501  |
| 4  | 5  | 14 | 1 | 118.93 | 370.1059  |
| 1  | 6  | 5  | 1 | 118.33 | 383.0370  |
| 1  | 6  | 7  | 1 | 120.89 | 383.0370  |
| 6  | 1  | 10 | 1 | 119.40 | 334.2226  |
| 5  | 6  | 7  | 1 | 120.77 | 749.5227  |
| 6  | 5  | 14 | 1 | 118.02 | 279.8123  |
| 6  | 7  | 8  | 1 | 119.02 | 591.6013  |
| 6  | 7  | 15 | 1 | 119.86 | 279.8123  |
| 7  | 8  | 9  | 1 | 121.23 | 581.3579  |
| 8  | 7  | 15 | 1 | 121.09 | 370.1059  |
| 7  | 8  | 16 | 1 | 119.41 | 327.5501  |
| 8  | 9  | 10 | 1 | 121.47 | 477.8969  |
| 9  | 8  | 16 | 1 | 119.36 | 292.5916  |
| 8  | 9  | 17 | 1 | 120.29 | 315.0007  |
| 1  | 10 | 9  | 1 | 117.88 | 572.5763  |
| 1  | 10 | 18 | 1 | 121.99 | 234.4201  |
| 10 | 9  | 17 | 1 | 118.23 | 324.5450  |
| 9  | 10 | 18 | 1 | 120.12 | 615.5611  |
| 10 | 18 | 19 | 1 | 126.92 | 341.6443  |
| 10 | 18 | 20 | 1 | 111.71 | 286.3415  |
| 19 | 18 | 20 | 1 | 121.38 | 1012.9014 |
| 18 | 20 | 21 | 1 | 116.79 | 660.6782  |
| 20 | 21 | 22 | 1 | 110.44 | 784.8779  |
| 20 | 21 | 26 | 1 | 107.00 | 784.8779  |
| 20 | 21 | 31 | 1 | 107.69 | 434.4930  |
| 21 | 22 | 23 | 1 | 112.77 | 562.9091  |
| 22 | 21 | 26 | 1 | 109.63 | 664.7192  |
| 21 | 22 | 27 | 1 | 107.98 | 401.2313  |
| 21 | 22 | 28 | 1 | 109.91 | 401.2313  |
| 22 | 21 | 31 | 1 | 110.31 | 349.5285  |
| 22 | 23 | 24 | 1 | 107.28 | 464.7117  |
| 23 | 22 | 27 | 1 | 109.13 | 381.9184  |
| 23 | 22 | 28 | 1 | 108.89 | 381.9184  |
| 22 | 23 | 32 | 1 | 107.85 | 525.0364  |
| 22 | 23 | 36 | 1 | 111.27 | 525.0364  |
| 23 | 24 | 25 | 1 | 118.87 | 607.0102  |
| 24 | 23 | 32 | 1 | 107.33 | 697.0866  |

|    |    |    |   |        |          |
|----|----|----|---|--------|----------|
| 24 | 23 | 36 | 1 | 115.14 | 697.0866 |
| 23 | 24 | 48 | 1 | 108.03 | 862.6692 |
| 24 | 25 | 26 | 1 | 107.29 | 464.7117 |
| 24 | 25 | 40 | 1 | 115.11 | 697.0866 |
| 24 | 25 | 44 | 1 | 107.38 | 697.0866 |
| 25 | 24 | 48 | 1 | 107.94 | 862.6692 |
| 21 | 26 | 25 | 1 | 112.74 | 562.9091 |
| 21 | 26 | 29 | 1 | 108.35 | 401.2313 |
| 21 | 26 | 30 | 1 | 110.28 | 401.2313 |
| 26 | 21 | 31 | 1 | 111.71 | 349.5285 |
| 25 | 26 | 29 | 1 | 108.99 | 381.9184 |
| 25 | 26 | 30 | 1 | 108.83 | 381.9184 |
| 26 | 25 | 40 | 1 | 111.33 | 525.0364 |
| 26 | 25 | 44 | 1 | 107.81 | 525.0364 |
| 27 | 22 | 28 | 1 | 108.04 | 333.4131 |
| 29 | 26 | 30 | 1 | 107.50 | 333.4131 |
| 23 | 32 | 33 | 1 | 111.08 | 365.3633 |
| 23 | 32 | 34 | 1 | 110.66 | 365.3633 |
| 23 | 32 | 35 | 1 | 109.67 | 365.3633 |
| 32 | 23 | 36 | 1 | 107.69 | 550.0783 |
| 33 | 32 | 34 | 1 | 109.06 | 311.5716 |
| 33 | 32 | 35 | 1 | 107.81 | 311.5716 |
| 34 | 32 | 35 | 1 | 108.48 | 311.5716 |
| 23 | 36 | 37 | 1 | 110.14 | 365.3633 |
| 23 | 36 | 38 | 1 | 109.27 | 365.3633 |
| 23 | 36 | 39 | 1 | 113.43 | 365.3633 |
| 37 | 36 | 38 | 1 | 108.12 | 311.5716 |
| 37 | 36 | 39 | 1 | 108.66 | 311.5716 |
| 38 | 36 | 39 | 1 | 107.04 | 311.5716 |
| 25 | 40 | 41 | 1 | 109.35 | 365.3633 |
| 25 | 40 | 42 | 1 | 110.09 | 365.3633 |
| 25 | 40 | 43 | 1 | 113.43 | 365.3633 |
| 40 | 25 | 44 | 1 | 107.63 | 550.0783 |
| 41 | 40 | 42 | 1 | 108.04 | 311.5716 |
| 41 | 40 | 43 | 1 | 107.31 | 311.5716 |
| 42 | 40 | 43 | 1 | 108.46 | 311.5716 |
| 25 | 44 | 45 | 1 | 110.64 | 365.3633 |
| 25 | 44 | 46 | 1 | 111.06 | 365.3633 |
| 25 | 44 | 47 | 1 | 109.72 | 365.3633 |
| 45 | 44 | 46 | 1 | 109.05 | 311.5716 |
| 45 | 44 | 47 | 1 | 108.49 | 311.5716 |
| 46 | 44 | 47 | 1 | 107.80 | 311.5716 |
| 24 | 48 | 49 | 1 | 111.05 | 720.8339 |
| 48 | 49 | 50 | 1 | 111.80 | 485.3804 |
| 48 | 49 | 51 | 1 | 105.49 | 485.3804 |
| 48 | 49 | 52 | 1 | 111.82 | 485.3804 |
| 50 | 49 | 51 | 1 | 109.41 | 311.5716 |
| 50 | 49 | 52 | 1 | 108.85 | 311.5716 |
| 51 | 49 | 52 | 1 | 109.40 | 311.5716 |

; Torsions

[ dihedrals ]

; naphthalene harmonic

|   |   |   |   |   |     |        |
|---|---|---|---|---|-----|--------|
| 1 | 2 | 3 | 4 | 2 | 0.0 | 47.600 |
| 2 | 3 | 4 | 5 | 2 | 0.0 | 47.600 |
| 3 | 4 | 5 | 6 | 2 | 0.0 | 47.600 |
| 4 | 5 | 6 | 1 | 2 | 0.0 | 47.600 |
| 2 | 1 | 6 | 5 | 2 | 0.0 | 47.600 |
| 6 | 1 | 2 | 3 | 2 | 0.0 | 47.600 |

|                               |    |    |    |   |       |         |   |
|-------------------------------|----|----|----|---|-------|---------|---|
| 6                             | 7  | 8  | 9  | 2 | 0.0   | 47.600  |   |
| 7                             | 8  | 9  | 10 | 2 | 0.0   | 47.600  |   |
| 8                             | 9  | 10 | 1  | 2 | 0.0   | 47.600  |   |
| 6                             | 1  | 10 | 9  | 2 | 0.0   | 47.600  |   |
| 1                             | 6  | 7  | 8  | 2 | 0.0   | 47.600  |   |
| 10                            | 1  | 6  | 7  | 2 | 0.0   | 47.600  |   |
| 10                            | 1  | 6  | 5  | 2 | 180.0 | 47.600  |   |
| 2                             | 1  | 6  | 7  | 2 | 180.0 | 47.600  |   |
| ; naphthalene harmonic o.o.p. |    |    |    |   |       |         |   |
| 12                            | 2  | 4  | 3  | 2 | 0.0   | 490.421 |   |
| 13                            | 3  | 5  | 4  | 2 | 0.0   | 490.421 |   |
| 14                            | 4  | 6  | 5  | 2 | 0.0   | 490.421 |   |
| 15                            | 6  | 8  | 7  | 2 | 0.0   | 490.421 |   |
| 16                            | 7  | 9  | 8  | 2 | 0.0   | 490.421 |   |
| 17                            | 8  | 10 | 9  | 2 | 0.0   | 490.421 |   |
| 11                            | 1  | 3  | 2  | 2 | 0.0   | 490.421 |   |
| 10                            | 1  | 9  | 18 | 2 | 0.0   | 401.265 |   |
| ; d2 dihedral (harm)          |    |    |    |   |       |         |   |
| 19                            | 18 | 20 | 21 | 2 | 0.0   | 30.340  |   |
| ; o.o.p. COO-NfO              |    |    |    |   |       |         |   |
| 10                            | 19 | 20 | 18 | 2 | 0.0   | 670.464 |   |
| ; TEMPO ring                  |    |    |    |   |       |         |   |
| 20                            | 21 | 22 | 23 | 1 | 0.00  | 7.769   | 3 |
| 20                            | 21 | 26 | 25 | 1 | 0.00  | 7.769   | 3 |
| 26                            | 21 | 22 | 23 | 1 | 0.00  | 0.554   | 3 |
| 22                            | 21 | 26 | 25 | 1 | 0.00  | 0.554   | 3 |
| 22                            | 23 | 24 | 25 | 1 | 0.00  | 0.554   | 3 |
| 23                            | 24 | 25 | 26 | 1 | 0.00  | 0.554   | 3 |
| 21                            | 22 | 23 | 24 | 1 | 0.00  | 0.554   | 3 |
| 24                            | 25 | 26 | 21 | 1 | 0.00  | 0.554   | 3 |
| ; OCH3@TEMPO                  |    |    |    |   |       |         |   |
| 32                            | 23 | 24 | 48 | 1 | 0.00  | 3.060   | 3 |
| 36                            | 23 | 24 | 48 | 1 | 0.00  | 3.060   | 3 |
| 22                            | 23 | 24 | 48 | 1 | 0.00  | 22.449  | 3 |
| 48                            | 24 | 25 | 26 | 1 | 0.00  | 22.449  | 3 |
| ; CH3@TEMPO                   |    |    |    |   |       |         |   |
| 21                            | 22 | 23 | 32 | 1 | 0.00  | 11.573  | 3 |
| 32                            | 23 | 24 | 25 | 1 | 0.00  | 0.554   | 3 |
| 21                            | 22 | 23 | 36 | 1 | 0.00  | 0.554   | 3 |
| 36                            | 23 | 24 | 25 | 1 | 0.00  | 0.554   | 3 |
| 40                            | 25 | 26 | 21 | 1 | 0.00  | 0.554   | 3 |
| 23                            | 24 | 25 | 40 | 1 | 0.00  | 0.554   | 3 |
| 44                            | 25 | 26 | 21 | 1 | 0.00  | 0.554   | 3 |
| 23                            | 24 | 25 | 44 | 1 | 0.00  | 0.554   | 3 |
| ; -CH3@C24                    |    |    |    |   |       |         |   |
| 22                            | 23 | 32 | 33 | 1 | 0.00  | 3.443   | 3 |
| 22                            | 23 | 32 | 34 | 1 | 0.00  | 3.443   | 3 |
| 22                            | 23 | 32 | 35 | 1 | 0.00  | 3.443   | 3 |
| 24                            | 23 | 32 | 33 | 1 | 0.00  | 3.638   | 3 |
| 24                            | 23 | 32 | 34 | 1 | 0.00  | 3.638   | 3 |
| 24                            | 23 | 32 | 35 | 1 | 0.00  | 3.638   | 3 |
| 24                            | 23 | 36 | 37 | 1 | 0.00  | 3.638   | 3 |
| 24                            | 23 | 36 | 38 | 1 | 0.00  | 3.638   | 3 |
| 24                            | 23 | 36 | 39 | 1 | 0.00  | 3.638   | 3 |
| 22                            | 23 | 36 | 37 | 1 | 0.00  | 3.443   | 3 |
| 22                            | 23 | 36 | 38 | 1 | 0.00  | 3.443   | 3 |
| 22                            | 23 | 36 | 39 | 1 | 0.00  | 3.443   | 3 |
| ; -CH3@C26                    |    |    |    |   |       |         |   |
| 24                            | 25 | 40 | 41 | 1 | 0.00  | 3.638   | 3 |

```

24 25 40 42 1 0.00 3.638 3
24 25 40 43 1 0.00 3.638 3
26 25 40 41 1 0.00 3.443 3
26 25 40 42 1 0.00 3.443 3
26 25 40 43 1 0.00 3.443 3
24 25 44 45 1 0.00 3.638 3
24 25 44 46 1 0.00 3.638 3
24 25 44 47 1 0.00 3.638 3
26 25 44 45 1 0.00 3.443 3
26 25 44 46 1 0.00 3.443 3
26 25 44 47 1 0.00 3.443 3
; CH3@NO
24 48 49 50 1 0.00 4.399 3
24 48 49 51 1 0.00 4.399 3
24 48 49 52 1 0.00 4.399 3
; d1 dihedral
1 10 18 19 1 0.00 -2.277 1
1 10 18 19 1 0.00 -12.225 2
1 10 18 19 1 0.00 -0.635 3
1 10 18 19 1 0.00 1.990 4
9 10 18 20 1 0.00 -2.277 1
9 10 18 20 1 0.00 -12.225 2
9 10 18 20 1 0.00 -0.635 3
9 10 18 20 1 0.00 1.990 4
; d3 dihedral
18 20 21 22 1 0.00 16.742 1
18 20 21 22 1 0.00 7.465 2
18 20 21 22 1 0.00 3.699 3
18 20 21 22 1 0.00 0.170 4
18 20 21 26 1 0.00 16.742 1
18 20 21 26 1 0.00 7.465 2
18 20 21 26 1 0.00 3.699 3
18 20 21 26 1 0.00 0.170 4
; d4 dihedral [transferred from GS]
23 24 48 49 1 0.00 23.126 1
23 24 48 49 1 0.00 22.487 2
23 24 48 49 1 0.00 4.000 3
23 24 48 49 1 0.00 13.548 4
25 24 48 49 1 0.00 23.126 1
25 24 48 49 1 0.00 22.487 2
25 24 48 49 1 0.00 4.000 3
25 24 48 49 1 0.00 13.548 4

; Nonbonded terms
[ pairs ]
; other nb interactions
18 23 2 1.000 0.280 0.081 0.3625 0.3483000
18 24 2 1.000 0.280 -0.275 0.3500 0.5590000
18 25 2 1.000 0.280 0.081 0.3625 0.3483000
18 32 2 1.000 0.280 -0.251 0.3625 0.3483000
18 36 2 1.000 0.280 -0.259 0.3625 0.3483000
18 40 2 1.000 0.280 -0.260 0.3625 0.3483000
18 44 2 1.000 0.280 -0.252 0.3625 0.3483000
20 24 2 1.000 -0.201 -0.275 0.3105 0.7905400
20 48 2 1.000 -0.201 -0.157 0.2960 0.8786400
20 32 2 1.000 -0.201 -0.251 0.3230 0.4925800
20 36 2 1.000 -0.201 -0.259 0.3230 0.4925800
20 40 2 1.000 -0.201 -0.260 0.3230 0.4925800
20 44 2 1.000 -0.201 -0.252 0.3230 0.4925800

```

|    |    |   |       |        |        |        |           |
|----|----|---|-------|--------|--------|--------|-----------|
| 21 | 48 | 2 | 1.000 | 0.006  | -0.157 | 0.3230 | 0.4925800 |
| 22 | 40 | 2 | 1.000 | -0.166 | -0.260 | 0.3500 | 0.2761400 |
| 22 | 44 | 2 | 1.000 | -0.166 | -0.252 | 0.3500 | 0.2761400 |
| 26 | 32 | 2 | 1.000 | -0.164 | -0.251 | 0.3500 | 0.2761400 |
| 26 | 36 | 2 | 1.000 | -0.164 | -0.259 | 0.3500 | 0.2761400 |
| 32 | 40 | 2 | 1.000 | -0.251 | -0.260 | 0.3500 | 0.2761400 |
| 32 | 44 | 2 | 1.000 | -0.251 | -0.252 | 0.3500 | 0.2761400 |
| 36 | 40 | 2 | 1.000 | -0.259 | -0.260 | 0.3500 | 0.2761400 |
| 36 | 44 | 2 | 1.000 | -0.259 | -0.252 | 0.3500 | 0.2761400 |

```
[ system ]
; Name
NfO-TEMPO-ME EES (nft) Joyce
```

```
[ molecules ]
; Compound      #mols
nft              1
```

### ***Toluene parameters***

Parameters from OPLS AA were employed to describe the 991 toluene molecules used for the solvated system. The corresponding lines in the topology files are the following:

· new atomtypes:

|    |         |       |   |             |             |
|----|---------|-------|---|-------------|-------------|
| CA | 12.0110 | 0.000 | A | 3.55000e-01 | 2.92880e-01 |
| CM | 12.0110 | 0.000 | A | 3.50000e-01 | 2.76144e-01 |
| HA | 1.0079  | 0.000 | A | 2.42000e-01 | 1.25520e-01 |
| HC | 1.0079  | 0.000 | A | 2.50000e-01 | 1.25520e-01 |

· new molecule:

```
[ moleculetype ]
tol              3
```

```
[ atoms ]
  1 CA          1 tol  CA          1 -0.115    12.01100
  2 CA          1 tol  CA          2 -0.115    12.01100
  3 CA          1 tol  CA          3 -0.115    12.01100
  4 CA          1 tol  CA          4 -0.115    12.01100
  5 CA          1 tol  CA          5 -0.115    12.01100
  6 CA          1 tol  CA          6 -0.115    12.01100
  7 CM          1 tol  CM          7 -0.065    12.01100
  8 HA          1 tol  HA          8  0.115     1.00800
  9 HA          1 tol  HA          9  0.115     1.00800
 10 HA          1 tol  HA         10  0.115     1.00800
 11 HA          1 tol  HA         11  0.115     1.00800
 12 HA          1 tol  HA         12  0.115     1.00800
 13 HC          1 tol  HC         13  0.060     1.00800
 14 HC          1 tol  HC         14  0.060     1.00800
 15 HC          1 tol  HC         15  0.060     1.00800
```

## [bonds]

|   |    |   |        |           |
|---|----|---|--------|-----------|
| 1 | 2  | 1 | 0.1400 | 392459.20 |
| 2 | 3  | 1 | 0.1400 | 392459.20 |
| 3 | 4  | 1 | 0.1400 | 392459.20 |
| 4 | 5  | 1 | 0.1400 | 392459.20 |
| 1 | 6  | 1 | 0.1400 | 392459.20 |
| 5 | 6  | 1 | 0.1400 | 392459.20 |
| 6 | 7  | 1 | 0.1510 | 265265.60 |
| 1 | 8  | 1 | 0.1080 | 307105.60 |
| 2 | 9  | 1 | 0.1080 | 307105.60 |
| 3 | 10 | 1 | 0.1080 | 307105.60 |
| 4 | 11 | 1 | 0.1080 | 307105.60 |
| 5 | 12 | 1 | 0.1080 | 307105.60 |
| 7 | 13 | 1 | 0.1090 | 284512.00 |
| 7 | 14 | 1 | 0.1090 | 284512.00 |
| 7 | 15 | 1 | 0.1090 | 284512.00 |

## [ angles ]

|    |   |    |   |       |       |
|----|---|----|---|-------|-------|
| 1  | 2 | 3  | 1 | 120.0 | 527.2 |
| 6  | 1 | 2  | 1 | 120.0 | 527.2 |
| 8  | 1 | 2  | 1 | 120.0 | 292.9 |
| 1  | 2 | 9  | 1 | 120.0 | 292.9 |
| 2  | 3 | 4  | 1 | 120.0 | 527.2 |
| 9  | 2 | 3  | 1 | 120.0 | 292.9 |
| 2  | 3 | 10 | 1 | 120.0 | 292.9 |
| 3  | 4 | 5  | 1 | 120.0 | 527.2 |
| 10 | 3 | 4  | 1 | 120.0 | 292.9 |
| 3  | 4 | 11 | 1 | 120.0 | 292.9 |
| 4  | 5 | 6  | 1 | 120.0 | 527.2 |
| 11 | 4 | 5  | 1 | 120.0 | 292.9 |
| 4  | 5 | 12 | 1 | 120.0 | 292.9 |
| 1  | 6 | 5  | 1 | 120.0 | 527.2 |
| 1  | 6 | 7  | 1 | 120.0 | 585.8 |
| 8  | 1 | 6  | 1 | 120.0 | 292.9 |
| 5  | 6 | 7  | 1 | 120.0 | 585.8 |
| 12 | 5 | 6  | 1 | 120.0 | 292.9 |
| 6  | 7 | 13 | 1 | 109.5 | 292.9 |
| 6  | 7 | 14 | 1 | 109.5 | 292.9 |
| 6  | 7 | 15 | 1 | 109.5 | 292.9 |
| 14 | 7 | 13 | 1 | 107.8 | 276.1 |
| 15 | 7 | 13 | 1 | 107.8 | 276.1 |
| 15 | 7 | 14 | 1 | 107.8 | 276.1 |

## [ dihedrals ]

|    |   |   |    |   |       |         |   |
|----|---|---|----|---|-------|---------|---|
| 1  | 2 | 3 | 4  | 1 | 180.0 | 60.6700 | 2 |
| 6  | 1 | 2 | 3  | 1 | 180.0 | 60.6700 | 2 |
| 8  | 1 | 2 | 3  | 1 | 180.0 | 60.6700 | 2 |
| 1  | 2 | 3 | 10 | 1 | 180.0 | 60.6700 | 2 |
| 5  | 6 | 1 | 2  | 1 | 180.0 | 60.6700 | 2 |
| 7  | 6 | 1 | 2  | 1 | 180.0 | 60.6700 | 2 |
| 6  | 1 | 2 | 9  | 1 | 180.0 | 60.6700 | 2 |
| 8  | 1 | 2 | 9  | 1 | 180.0 | 60.6700 | 2 |
| 2  | 3 | 4 | 5  | 1 | 180.0 | 60.6700 | 2 |
| 9  | 2 | 3 | 4  | 1 | 180.0 | 60.6700 | 2 |
| 2  | 3 | 4 | 11 | 1 | 180.0 | 60.6700 | 2 |
| 9  | 2 | 3 | 10 | 1 | 180.0 | 60.6700 | 2 |
| 3  | 4 | 5 | 6  | 1 | 180.0 | 60.6700 | 2 |
| 10 | 3 | 4 | 5  | 1 | 180.0 | 60.6700 | 2 |
| 3  | 4 | 5 | 12 | 1 | 180.0 | 60.6700 | 2 |



|    |   |   |    |   |       |         |   |
|----|---|---|----|---|-------|---------|---|
| 10 | 3 | 4 | 11 | 1 | 180.0 | 60.6700 | 2 |
| 4  | 5 | 6 | 1  | 1 | 180.0 | 60.6700 | 2 |
| 4  | 5 | 6 | 7  | 1 | 180.0 | 60.6700 | 2 |
| 11 | 4 | 5 | 6  | 1 | 180.0 | 60.6700 | 2 |
| 11 | 4 | 5 | 12 | 1 | 180.0 | 60.6700 | 2 |
| 8  | 1 | 6 | 5  | 1 | 180.0 | 60.6700 | 2 |
| 1  | 6 | 5 | 12 | 1 | 180.0 | 60.6700 | 2 |
| 8  | 1 | 6 | 7  | 1 | 180.0 | 60.6700 | 2 |
| 12 | 5 | 6 | 7  | 1 | 0.0   | 60.6700 | 2 |

· new “molecules” entry:

tol 991

### Velocity auto-correlation function (acf)

In order to prove that the solute and solute+solvent snapshots, extracted from the MD trajectories, are independent, the solute center of mass velocity acf has been computed. Indeed, given that the vibrational motions take place on a faster time scale with respect to translational ones, sampling the conformational space explored by the MD runs with a time interval larger than that needed to annihilate the correlation of the translational velocity acf should grant also the absence of correlation between two successive snapshots.

The computed velocity acf is reported in red in the figure below.

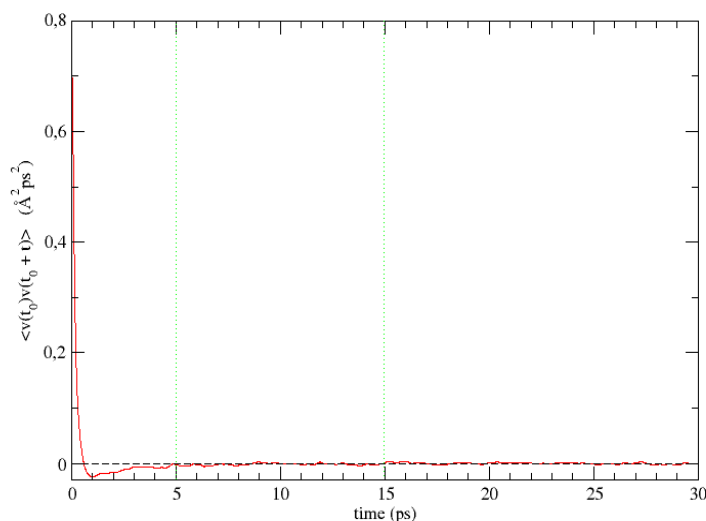

It appears that the correlation breaks down around 5 ps and at 15 ps (the shortest time effectively employed to sample the MD trajectories) the acf is definitively null.

### Solvation shell radius

Ten randomly selected snapshots were extracted from the GS dynamics in solvent, including increasingly large explicit solvent spheres and PCM cavities, to assess the convergence behavior on the electronic transition wavelength. As shown in the figure below, for each selected snapshot TDDFT EE transitions were computed for all the considered solvation shell radii ( $R_{\text{cut}}$ ). The

resulting wavelengths are plotted as differences from the “asymptotic value”, defined as the result at  $R_{\text{cut}} = 19 \text{ \AA}$ . The ME values (without charges and PCM, thus  $R_{\text{cut}} = 0$ ) are also reported. For the sake of completeness, the asymptotic values corresponding to each snapshot are listed aside.

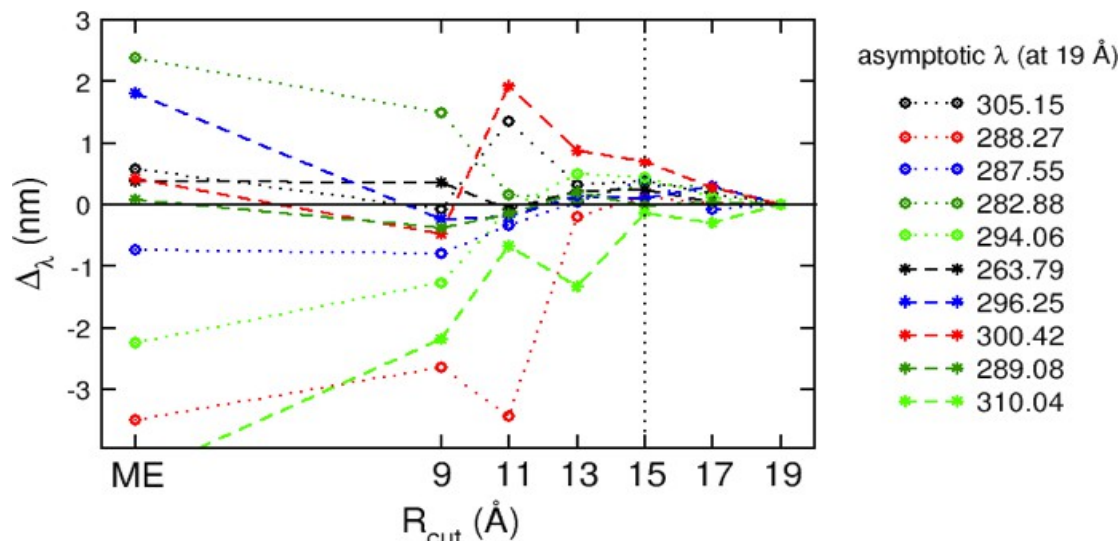

It appears that accounting for the first two solvation spheres (*i.e.*  $R_{\text{cut}} < 15 \text{ \AA}$ ) has a not negligible effect on wavelength (which can change more than 3 nm). Nonetheless, a further increase of the solvation sphere beyond 15  $\text{\AA}$  does not sensibly affect the results, being the variation bound to 0.7 nm.

## References

- [1] van der Spoel, D.; Lindahl, E.; Hess, B.; van Buuren, A. R.; Apol, E.; Meulenhoff, P.; Tieleman, D.; Sijbers, A.; Feenstra, K.; van Drunen, R.; Berendsen, H. *GROMACS4.5; Gromacs User Manual version 4.5.4: [www.gromacs.org](http://www.gromacs.org), 2010*
- [2] Marenich, A.; Jerome, S.; Cramer, C.; Truhlar, D. *J. Chem. Theory Comput.* **2012**, 8, 575.
- [3] Jorgensen, W.; Maxwell, D.; Tirado-Rives, J. *J. Am. Chem. Soc.* **1996**, 118, 11225.
- [4] Damm, W.; Frontera, A.; Tirado-Rives, J.; Jorgensen, W. *J. Comp. Chem.* **1997**, 18, 1955.
- [5] Cacelli, I.; Prampolini, G. *J. Chem. Theory Comput.* **2007**, 3, 1803.
- [6] Barone, V.; Cacelli, I.; De Mitri, N.; Licari, D.; Monti, S.; Prampolini, G. *Phys. Chem. Chem. Phys.* **2013**, 15, 3736.
